# Supplementary material for: Coumarin 6 and 1,6-diphenyl-1,3,5-hexatriene (DPH) as fluorescent probes to monitor protein aggregation
Source: Royal Society of Chemistry journal article supplement (doi:10.1039/c0an00829j), 2011-01-01
Supplement: c0an00829j.pdf [file c0an00829j.pdf]

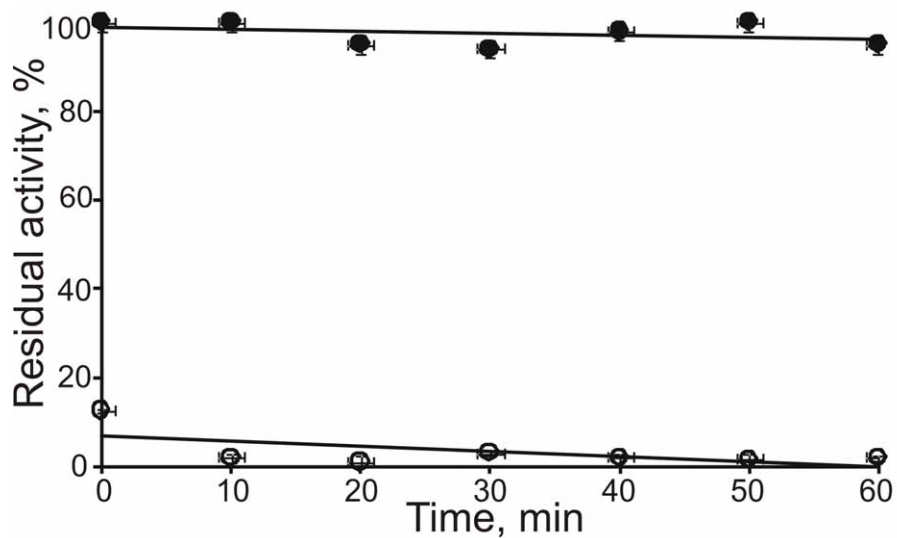

**Figure S1**

**Figure S1.** Measurement of activity of native (●) and aggregated (○) BCA at different time intervals. The esterase activity of BCA was measured using p-nitrophenyl acetate as the substrate, as per the reported protocol.<sup>S1</sup> 100 % activity refers to the initial activity of native BCA.

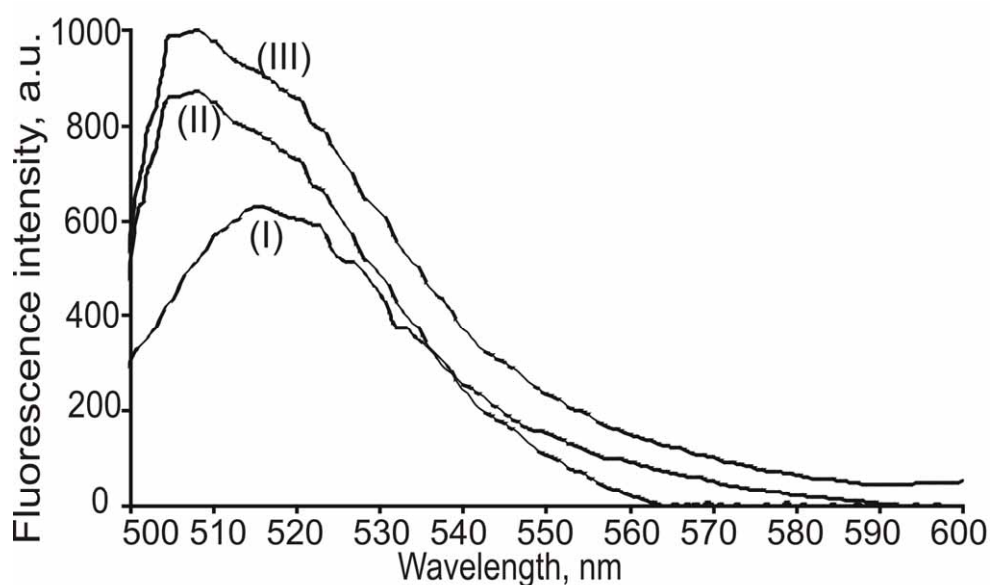

**Figure S2**

**Figure S2.** Effect of presence of Coumarin 6 during thermal aggregation of BCA on the fluorescence intensity of Coumarin 6. The fluorescence emission spectra Coumarin 6 alone (I), when added to BCA during aggregation (II) and when added to BCA after aggregation (III) are shown. The concentration of Coumarin 6 was 400 nM in each case. Samples were excited at 470 nm. Excitation slit width was kept at 5 nm and emission slit width was kept at 7.5 nm.

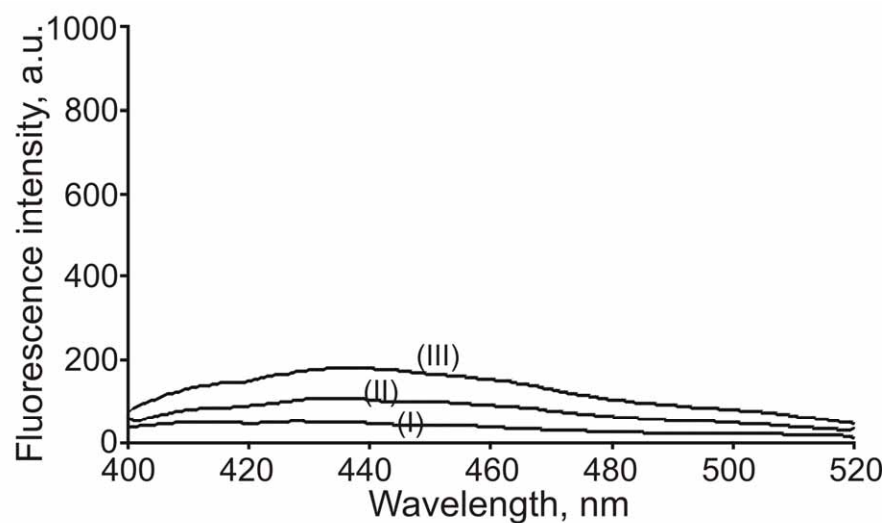

**Figure S3**

**Figure S3.** Effect of concentration of the dye on the fluorescence emission intensity of DPH. Fluorescence spectra of DPH were recorded at 5 nM (I), 500 nM (II) and 5  $\mu$ M (III) concentrations as shown. Samples were excited at 360 nm. Excitation slitwidth was kept at 5 nm and emission slitwidth was kept at 7.5 nm.

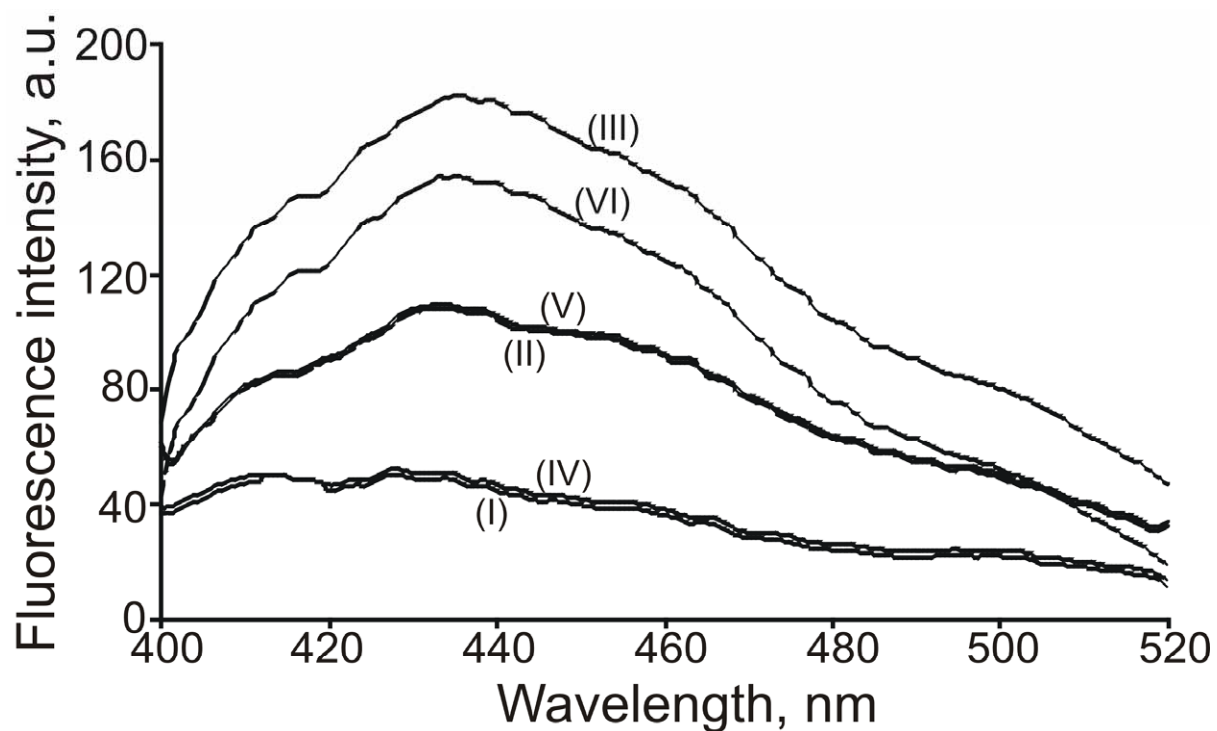

**Figure S4**

**Figure S4.** Effect of heating on the fluorescence emission intensity of DPH. Fluorescence emission spectra of DPH were recorded before (I, II, III) and after (IV, V, VI) heating at 5 nM (I, IV), 500 nM (II, V) and 5  $\mu$ M (III, VI). Samples were excited at 360 nm. Excitation slitwidth was kept at 5 nm and emission slitwidth was kept at 7.5 nm.

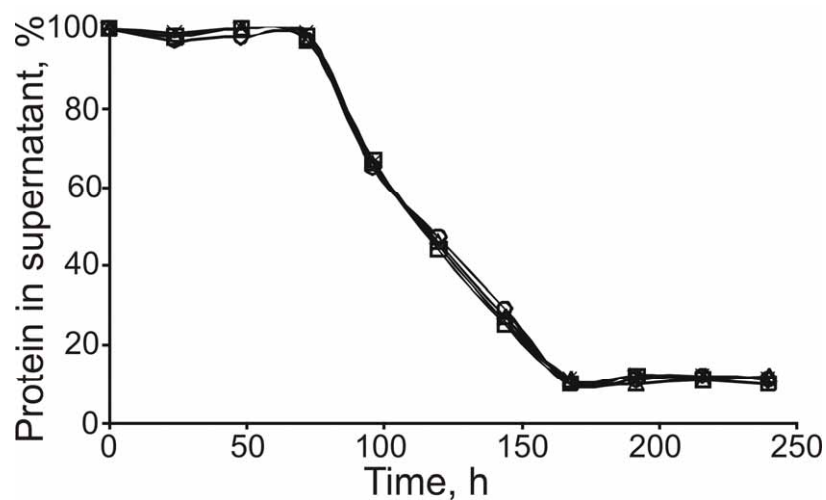

**Figure S5**

**Figure S5.** Effect of dye on the folding/unfolding equilibrium of  $\alpha$ -synuclein. Samples were centrifuged after addition of 2  $\mu$ M thioflavin T (○), 50 nM Coumarin 6 (△) and 50 nM DPH (□) in separate experiments at different time intervals. The amount of protein in the supernatant was estimated by the dye binding method.<sup>38</sup> The amount of protein in the supernatant obtained in the absence of any dye (×) is shown for comparison. 100 % protein refers to the amount of protein in the starting sample in each case.

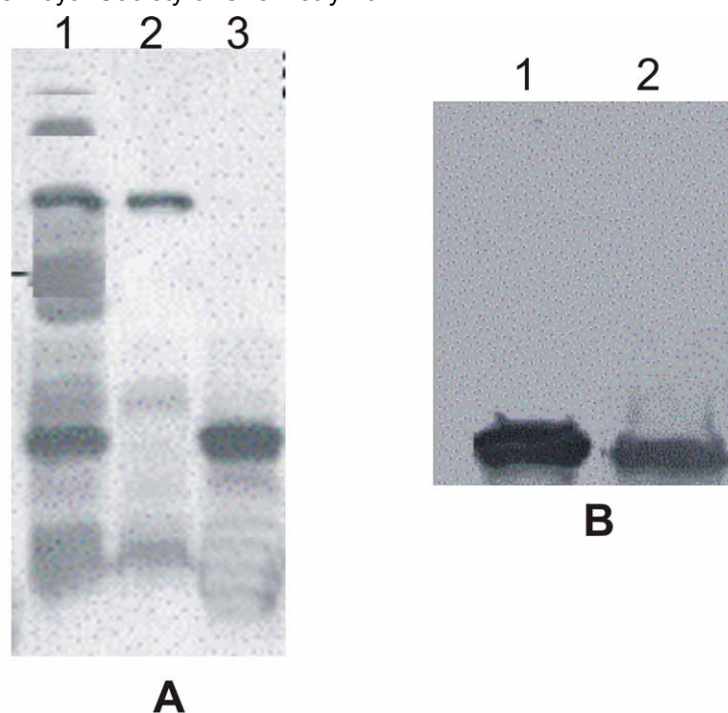

**Figure S6**

**Figure S6.** Purification of  $\alpha$ -synuclein expressed in *E. coli* BL21 cells. Purification of  $\alpha$ -synuclein was carried out by acid treatment and anion exchange chromatography, as per the reported protocol.<sup>42</sup> The purity of the samples was checked by (A) SDS-PAGE and (B) Western blotting. Samples were loaded on 15 % crosslinked denaturing polyacrylamide gel. After the electrophoretic run, the gel was silver stained. For (A), Lane 1: Bacterial lysate, lane 2: flowthrough; lane 3: purified protein. Protein load was equal in all the lanes. For western blotting, proteins were transferred electrophoretically to nitrocellulose membrane (0.45  $\mu$ m). After blocking overnight, the membrane was incubated with anti- $\alpha$ -synuclein monoclonal antibody followed by anti-mouse horseradish peroxidase (HRP)-conjugated antibody as the secondary antibody. The presence of the bands was visualized by adding 1% (v v<sup>-1</sup>) tetramethyl benzidine/hydrogen peroxide (TMB/H<sub>2</sub>O<sub>2</sub>). For (B), Lane 1: Bacterial lysate; lane 2: Purified protein.

## References

S1. Y. Pocker, and J. T. Stone, *Biochemistry* 1967, 6, 668-678.
